# Supplementary material for: Relationship between Phenolic Compounds and Antioxidant Activity in Berries and Leaves of Raspberry Genotypes and Their Genotyping by SSR Markers
Source: MDPI journal article supplement (doi:10.3390/antiox11101961), 2022-09-30
Supplement: s1 [file s1]

Supplementary Tables

Table S1. Dry matter content (%) of raspberry berries and leaves.

| Genotype     | Berries    | Leaves     |                   |                |
|--------------|------------|------------|-------------------|----------------|
|              |            | Flowering  | Fruit Development | Fruit Ripening |
| 1-14-1       | 13.1 ± 0.7 | 36.8 ± 1.5 | 38.4 ± 3.0        | 39.4 ± 2.9     |
| 1-14-2       | 14.4 ± 0.3 | 35.8 ± 2.2 | 36.8 ± 1.5        | 39.1 ± 2.2     |
| 1-14-2(zh)   | 13.7 ± 0.2 | 35.4 ± 1.7 | 36.8 ± 2.0        | 38.8 ± 1.0     |
| 1-45-1       | 15.8 ± 1.2 | 31.9 ± 2.0 | 33.1 ± 1.2        | 37.8 ± 2.1     |
| 1-45-2       | 13.7 ± 0.5 | 30.1 ± 0.9 | 36.9 ± 1.9        | 42.9 ± 3.6     |
| 1-70-1       | 11.9 ± 0.4 | 34.5 ± 0.7 | 37.9 ± 2.6        | 40.7 ± 3.1     |
| 2-66-1       | 14.7 ± 0.5 | 30.7 ± 0.8 | 35.7 ± 2.7        | 39.1 ± 1.2     |
| 2-66-2       | 13.1 ± 1.1 | 35.0 ± 0.5 | 38.1 ± 3.2        | 39.5 ± 2.3     |
| 2-66-3       | 12.9 ± 0.3 | 29.5 ± 0.8 | 33.0 ± 2.0        | 33.3 ± 1.2     |
| 3-117-1      | 15.2 ± 1.6 | 33.5 ± 0.6 | 39.7 ± 1.2        | 41.8 ± 3.0     |
| 9-121-2      | 13.6 ± 1.1 | 33.9 ± 1.9 | 39.7 ± 0.7        | 42.4 ± 1.8     |
| 9-121-4      | 11.4 ± 0.4 | 30.9 ± 0.9 | 33.0 ± 1.7        | 37.8 ± 3.8     |
| 9-121-5      | 16.6 ± 0.6 | 34.4 ± 2.4 | 38.0 ± 2.8        | 40.9 ± 3.6     |
| 11-110-2     | 14.7 ± 0.4 | 35.8 ± 2.3 | 36.4 ± 0.9        | 38.0 ± 2.7     |
| Abrikosovaya | 15.1 ± 0.3 | 34.7 ± 1.3 | 34.5 ± 1.4        | 41.5 ± 3.8     |
| Arbat        | 10.8 ± 0.7 | 29.7 ± 0.3 | 36.5 ± 2.2        | 41.8 ± 1.1     |
| Gusar        | 17.1 ± 1.3 | 37.3 ± 1.4 | 39.0 ± 1.8        | 40.6 ± 3.4     |
| Karamelka    | 17.6 ± 1.4 | 32.7 ± 0.9 | 35.9 ± 3.1        | 39.1 ± 0.9     |
| Himbo Top    | 13.0 ± 0.6 | 30.1 ± 2.1 | 35.7 ± 0.5        | 40.8 ± 2.8     |
| Octavia      | 14.1 ± 0.8 | 34.4 ± 2.5 | 35.3 ± 1.9        | 37.5 ± 1.0     |
| Polana       | 15.9 ± 0.1 | 25.1 ± 0.6 | 36.5 ± 3.3        | 39.3 ± 2.4     |
| Polesie      | 18.4 ± 0.9 | 27.3 ± 0.8 | 31.2 ± 1.1        | 45.7 ± 2.0     |
| Polka        | 15.9 ± 0.7 | 31.6 ± 1.9 | 34.3 ± 2.9        | 39.2 ± 2.3     |
| Porana Rosa  | 11.6 ± 0.4 | 32.1 ± 2.3 | 35.9 ± 1.2        | 38.8 ± 1.3     |
| Silvan       | 12.5 ± 0.7 | 35.1 ± 0.7 | 38.6 ± 2.7        | 40.4 ± 3.4     |

Table S2. Effect of genotype on total polyphenol content (mg GAE/g DW) in raspberry leaves.

| Genotype     | Flowering        | Fruit Development | Fruit Ripening   |
|--------------|------------------|-------------------|------------------|
| 1-14-1       | 55.4 ± 4.2 efg   | 55.7 ± 3.5 f      | 69.6 ± 6.4 cdefg |
| 1-14-2       | 51.5 ± 3.4 efgh  | 76.1 ± 1.7 bcde   | 97.0 ± 5.3 b     |
| 1-14-2(zh)   | 57.8 ± 2.9 def   | 68.6 ± 3.8 cdef   | 75.5 ± 3.7 cdef  |
| 1-45-1       | 47.2 ± 3.5 fghij | 76.0 ± 9.5 bcde   | 66.8 ± 6.2 defgh |
| 1-45-2       | 44.2 ± 2.8 ghij  | 62.4 ± 3.3 def    | 70.0 ± 5.6 cdef  |
| 1-70-1       | 49.7 ± 3.5 fghi  | 73.4 ± 6.1 bcdef  | 81.8 ± 6.5 bcd   |
| 2-66-1       | 57.8 ± 4.8 def   | 73.0 ± 4.4 bcdef  | 77.8 ± 2.6 cde   |
| 2-66-2       | 55.1 ± 2.8 efg   | 73.8 ± 8.2 bcdef  | 58.3 ± 5.2 fghi  |
| 2-66-3       | 69.4 ± 6.6 cd    | 61.6 ± 5.5 ef     | 68.6 ± 3.8 defgh |
| 3-117-1      | 63.3 ± 5.0 de    | 73.4 ± 6.9 bcdef  | 86.7 ± 5.8 bc    |
| 9-121-2      | 56.1 ± 2.6 efg   | 66.6 ± 3.6 def    | 68.2 ± 3.4 defgh |
| 9-121-4      | 54.4 ± 2.6 efg   | 87.4 ± 3.9 bc     | 73.1 ± 7.2 cdef  |
| 9-121-5      | 38.8 ± 3.8 ij    | 66.6 ± 6.0 def    | 71.1 ± 4.9 cdef  |
| 11-110-2     | 35.2 ± 2.7 jk    | 64.4 ± 1.0 def    | 75.7 ± 3.8 cdef  |
| Abrikosovaya | 57.3 ± 4.3 def   | 66.9 ± 6.7 def    | 64.7 ± 6.7 defgh |
| Arbat        | 69.9 ± 3.0 cd    | 63.8 ± 8.0 def    | 51.7 ± 5.6 hi    |
| Gusar        | 39.8 ± 1.4 hij   | 55.6 ± 1.2 f      | 44.7 ± 3.0 ij    |
| Karamelka    | 75.7 ± 3.9 bc    | 66.8 ± 5.3 def    | 52.4 ± 2.7 ghi   |
| Himbo Top    | 75.8 ± 8.2 bc    | 82.0 ± 6.4 bcd    | 73.6 ± 6.2 cdef  |
| Octavia      | 20.7 ± 2.4 l     | 27.2 ± 1.9 g      | 31.5 ± 2.8 j     |
| Polana       | 63.6 ± 2.5 de    | 32.1 ± 2.4 g      | 58.9 ± 4.4 fghi  |
| Polesie      | 26.6 ± 2.7 kl    | 63.4 ± 3.5 def    | 36.2 ± 1.4 j     |
| Polka        | 62.8 ± 2.4 de    | 74.0 ± 6.7 bcdef  | 61.4 ± 5.3 efgh  |
| Porana Rosa  | 82.9 ± 3.8 b     | 92.0 ± 9.4 b      | 80.3 ± 5.3 cd    |
| Silvan       | 133.8 ± 4.0 a    | 132.5 ± 9.3 a     | 129.5 ± 8.7 a    |

Results are expressed as mean ± SE (*n* = 3). Different letters represent statistically significant differences (*p* < 0.05).

**Table S3.** Effect of genotype on total flavonoid content (mg RE/g DW) in raspberry leaves.

| Genotype     | Flowering       | Fruit Development | Fruit Ripening  |
|--------------|-----------------|-------------------|-----------------|
| 1-14-1       | 48.8 ± 4.6 def  | 43.9 ± 4.2 defgh  | 51.1 ± 1.8 f    |
| 1-14-2       | 50.3 ± 2.3 cdef | 55.6 ± 4.1 bcd    | 64.8 ± 2.8 bcde |
| 1-14-2(zh)   | 49.5 ± 1.3 def  | 49.7 ± 2.2 cdefgh | 54.7 ± 4.0 def  |
| 1-45-1       | 33.0 ± 1.0 gh   | 50.6 ± 5.9 cdefg  | 49.1 ± 2.1 f    |
| 1-45-2       | 34.4 ± 3.8 gh   | 55.9 ± 1.4 bcd    | 53.7 ± 3.1 ef   |
| 1-70-1       | 34.2 ± 1.5 gh   | 43.9 ± 3.4 defgh  | 51.3 ± 4.8 f    |
| 2-66-1       | 55.1 ± 4.1 cdef | 54.6 ± 4.9 bcde   | 50.2 ± 1.4 f    |
| 2-66-2       | 48.3 ± 2.7 def  | 52.9 ± 5.5 bcdef  | 52.5 ± 4.7 ef   |
| 2-66-3       | 61.8 ± 7.0 abc  | 50.0 ± 2.1 cdefgh | 75.4 ± 7.8 ab   |
| 3-117-1      | 55.4 ± 3.3 cde  | 46.8 ± 4.4 defgh  | 55.5 ± 3.5 def  |
| 9-121-2      | 48.7 ± 5.6 def  | 37.8 ± 0.9 gh     | 56.8 ± 6.6 cdef |
| 9-121-4      | 47.7 ± 1.8 def  | 71.3 ± 5.2 a      | 68.6 ± 4.6 abc  |
| 9-121-5      | 27.9 ± 1.6 h    | 37.6 ± 1.7 gh     | 45.6 ± 3.0 fgh  |
| 11-110-2     | 29.9 ± 2.1 h    | 64.7 ± 5.7 ab     | 67.1 ± 3.4 abcd |
| Abrikosovaya | 43.5 ± 2.2 efg  | 62.4 ± 3.7 abc    | 69.9 ± 5.7 ab   |
| Arbat        | 42.9 ± 4.3 fg   | 36.6 ± 1.7 h      | 33.7 ± 1.8 hij  |
| Gusar        | 30.6 ± 2.6 h    | 41.4 ± 1.4 efg    | 32.4 ± 1.7 ij   |
| Karamelka    | 48.3 ± 3.6 def  | 40.9 ± 4.4 fgh    | 44.5 ± 0.9 fghi |
| Himbo Top    | 68.9 ± 4.1 ab   | 74.2 ± 8.9 a      | 65.5 ± 5.5 bcde |
| Octavia      | 14.4 ± 1.6 i    | 23.2 ± 0.9 i      | 17.9 ± 0.3 k    |
| Polana       | 45.8 ± 6.2 def  | 24.1 ± 1.6 i      | 34.9 ± 3.5 ghij |
| Polesie      | 14.9 ± 1.0 i    | 40.4 ± 2.6 fgh    | 28.5 ± 1.2 jk   |
| Polka        | 52.5 ± 5.3 cdef | 47.9 ± 4.5 defgh  | 52.5 ± 1.5 ef   |
| Porana Rosa  | 58.1 ± 3.0 bcd  | 57.2 ± 4.3 bcd    | 46.5 ± 1.9 fg   |
| Silvan       | 69.5 ± 4.7 a    | 71.6 ± 3.0 a      | 79.6 ± 8.1 a    |

Results are expressed as mean ± SE (*n* = 3). Different letters represent statistically significant differences (*p* < 0.05).

**Table S4.** Effect of genotype on antioxidant activity of raspberry leaves measured by FRAP assay (micromol TE/g DW).

| Genotype     | Flowering         | Fruit Development  | Fruit Ripening     |
|--------------|-------------------|--------------------|--------------------|
| 1-14-1       | 428.9 ± 24.6 bcde | 362.5 ± 31.4 fghi  | 449.3 ± 53.4 defg  |
| 1-14-2       | 474.8 ± 26.1 bc   | 465.7 ± 27.8 cde   | 567.3 ± 17.5 abc   |
| 1-14-2(zh)   | 398.4 ± 44.3 cde  | 416.3 ± 26.4 defg  | 508.2 ± 40.1 bcde  |
| 1-45-1       | 242.5 ± 28.4 hi   | 452.4 ± 49.7 cdef  | 414.0 ± 9.3 defg   |
| 1-45-2       | 306.1 ± 21.7 fgh  | 482.7 ± 26.0 cd    | 470.8 ± 41.3 cdefg |
| 1-70-1       | 289.2 ± 17.3 ghi  | 322.2 ± 21.5 ghi   | 397.0 ± 14.8 efg   |
| 2-66-1       | 468.4 ± 38.3 bc   | 376.1 ± 30.8 efghi | 432.6 ± 23.9 defg  |
| 2-66-2       | 349.0 ± 11.9 efg  | 483.4 ± 45.2 cd    | 495.3 ± 41.9 bcde  |
| 2-66-3       | 511.0 ± 26.9 ab   | 476.7 ± 24.0 cd    | 437.6 ± 31.1 defg  |
| 3-117-1      | 458.9 ± 28.4 bc   | 403.9 ± 17.9 defgh | 469.5 ± 35.7 cdefg |
| 9-121-2      | 450.0 ± 46.5 bcd  | 325.1 ± 23.3 ghi   | 501.4 ± 55.5 bcde  |
| 9-121-4      | 430.7 ± 21.7 bcde | 646.3 ± 51.3 a     | 510.0 ± 20.6 bcd   |
| 9-121-5      | 214.3 ± 9.4 i     | 298.7 ± 20.0 i     | 368.4 ± 18.9 ghi   |
| 11-110-2     | 239.9 ± 24.5 hi   | 631.8 ± 32.9 a     | 652.9 ± 21.2 a     |
| Abrikosovaya | 357.7 ± 30.0 defg | 626.7 ± 53.0 a     | 623.3 ± 58.5 a     |
| Arbat        | 305.9 ± 33.4 fgh  | 287.9 ± 32.9 i     | 270.1 ± 16.4 ij    |
| Gusar        | 230.7 ± 21.8 hi   | 314.0 ± 13.1 hi    | 274.2 ± 28.8 hij   |
| Karamelka    | 388.2 ± 20.2 cdef | 336.9 ± 12.3 ghi   | 373.5 ± 16.6 fgh   |
| Himbo Top    | 570.5 ± 32.2 a    | 590.4 ± 28.8 ab    | 651.7 ± 25.4 a     |
| Octavia      | 95.0 ± 11.6 j     | 174.1 ± 21.0 j     | 116.3 ± 8.5 k      |
| Polana       | 360.6 ± 19.0 defg | 197.2 ± 15.5 j     | 230.5 ± 14.2 j     |
| Polesie      | 88.4 ± 10.9 j     | 324.5 ± 21.4 ghi   | 239.6 ± 20.1 j     |
| Polka        | 469.6 ± 35.1 bc   | 413.1 ± 39.8 defgh | 482.6 ± 56.9 cdef  |
| Porana Rosa  | 431.9 ± 25.1 bcde | 494.0 ± 31.2 cd    | 378.8 ± 23.9 fg    |
| Silvan       | 507.4 ± 46.7 ab   | 523.3 ± 16.7 bc    | 596.5 ± 46.5 ab    |

Results are expressed as mean ± SE (*n* = 3). Different letters represent statistically significant differences (*p* < 0.05).

**Table S5.** Effect of genotype on antioxidant activity of raspberry leaves measured by ABTS assay (micromol TE/g DW).

| Genotype     | Flowering         | Fruit Development | Fruit Ripening    |
|--------------|-------------------|-------------------|-------------------|
| 1-14-1       | 415.5 ± 22.3 bcde | 335.1 ± 19.3 ghi  | 529.1 ± 33.3 def  |
| 1-14-2       | 440.8 ± 35.5 bcd  | 398.1 ± 26.3 fgh  | 703.3 ± 64.7 abc  |
| 1-14-2(zh)   | 393.4 ± 19.5 cdef | 354.6 ± 28.9 ghi  | 608.8 ± 57.4 bcd  |
| 1-45-1       | 77.2 ± 10.1 i     | 383.9 ± 23.1 fghi | 520.5 ± 31.5 def  |
| 1-45-2       | 306.7 ± 30.2 fgh  | 472.0 ± 49.2 def  | 603.0 ± 73.2 bcd  |
| 1-70-1       | 260.9 ± 19.0 gh   | 294.7 ± 23.7 i    | 473.7 ± 35.7 defg |
| 2-66-1       | 433.6 ± 30.6 bcd  | 423.4 ± 14.2 efg  | 505.5 ± 35.6 def  |
| 2-66-2       | 340.7 ± 31.6 defg | 423.0 ± 16.7 efg  | 582.5 ± 68.1 cd   |
| 2-66-3       | 515.0 ± 39.1 ab   | 372.4 ± 49.1 ghi  | 841.1 ± 29.9 a    |
| 3-117-1      | 454.2 ± 27.5 bc   | 509.7 ± 16.2 cde  | 611.7 ± 27.1 bcd  |
| 9-121-2      | 443.2 ± 42.8 bcd  | 308.5 ± 16.0 hi   | 601.7 ± 27.7 bcd  |
| 9-121-4      | 429.3 ± 26.1 bcde | 836.7 ± 42.0 a    | 786.6 ± 61.0 a    |
| 9-121-5      | 207.0 ± 11.6 h    | 386.5 ± 37.3 fghi | 441.6 ± 44.8 efg  |
| 11-110-2     | 242.0 ± 15.0 gh   | 708.8 ± 17.9 b    | 730.2 ± 34.4 ab   |
| Abrikosovaya | 394.7 ± 17.1 cdef | 592.5 ± 12.6 c    | 741.9 ± 71.4 ab   |
| Arbat        | 276.3 ± 18.9 gh   | 388.8 ± 20.9 fghi | 337.3 ± 36.9 gh   |
| Gusar        | 260.6 ± 12.2 gh   | 333.0 ± 18.0 ghi  | 346.6 ± 31.2 gh   |
| Karamelka    | 330.7 ± 38.5 efg  | 498.6 ± 42.8 de   | 426.0 ± 33.2 fg   |
| Himbo Top    | 600.2 ± 64.0 a    | 598.9 ± 12.0 c    | 729.8 ± 36.8 ab   |
| Octavia      | 95.4 ± 6.6 i      | 180.0 ± 7.6 j     | 202.3 ± 11.6 i    |
| Polana       | 307.6 ± 31.4 fgh  | 152.1 ± 8.0 j     | 339.4 ± 8.7 gh    |
| Polesie      | 70.1 ± 5.4 i      | 392.6 ± 20.4 fgh  | 281.0 ± 25.1 hi   |
| Polka        | 441.8 ± 30.8 bcd  | 554.5 ± 34.3 cd   | 576.8 ± 41.5 cde  |
| Porana Rosa  | 440.4 ± 40.8 bcd  | 738.4 ± 60.4 b    | 437.3 ± 48.3 efg  |
| Silvan       | 569.2 ± 63.5 a    | 590.7 ± 21.1 c    | 752.5 ± 21.8 a    |

Results are expressed as mean ± SE (*n* = 3). Different letters represent statistically significant differences (*p* < 0.05).

**Table S6.** Effect of different harvest periods (phenophase) on phenolic and flavonoid content in raspberry leaves.

| Genotype   | Phenophase | TPC (mg GAE/g DW) | TFC (mg RE/g DW) |
|------------|------------|-------------------|------------------|
| 1-14-1     | I          | 55.4 ± 4.2        | 48.8 ± 4.6       |
|            | II         | 55.7 ± 3.5        | 43.9 ± 4.2       |
|            | III        | 69.6 ± 6.4        | 51.1 ± 1.8       |
| 1-14-2     | I          | 51.5 ± 3.4 c      | 50.3 ± 2.3 b     |
|            | II         | 76.1 ± 1.7 b      | 55.6 ± 4.1 ab    |
|            | III        | 97.0 ± 5.3 a      | 64.8 ± 2.8 a     |
| 1-14-2(zh) | I          | 57.8 ± 2.9 b      | 49.5 ± 1.3       |
|            | II         | 68.6 ± 3.8 ab     | 49.7 ± 2.2       |
|            | III        | 75.5 ± 3.7 a      | 54.7 ± 4.0       |
| 1-45-1     | I          | 47.2 ± 3.5        | 33.0 ± 1.0 b     |
|            | II         | 76.0 ± 9.5        | 50.6 ± 5.9 a     |
|            | III        | 66.8 ± 6.2        | 49.1 ± 2.1 a     |
| 1-45-2     | I          | 44.2 ± 2.8 b      | 34.4 ± 3.8 b     |
|            | II         | 62.4 ± 3.3 a      | 55.9 ± 1.4 a     |
|            | III        | 70.0 ± 5.6 a      | 53.7 ± 3.1 a     |
| 1-70-1     | I          | 49.7 ± 3.5 b      | 34.2 ± 1.5 b     |
|            | II         | 73.4 ± 6.1 a      | 43.9 ± 3.4 ab    |
|            | III        | 81.8 ± 6.5 a      | 51.3 ± 4.8 b     |
| 2-66-1     | I          | 57.8 ± 4.8 b      | 55.1 ± 4.1       |
|            | II         | 73.0 ± 4.4 a      | 54.6 ± 4.9       |
|            | III        | 77.8 ± 2.6 a      | 50.2 ± 1.4       |
| 2-66-2     | I          | 55.1 ± 2.8        | 48.3 ± 2.7       |
|            | II         | 73.8 ± 8.2        | 52.9 ± 5.5       |
|            | III        | 58.3 ± 5.2        | 52.5 ± 4.7       |
| 2-66-3     | I          | 69.4 ± 6.6        | 61.8 ± 7.0       |
|            | II         | 61.6 ± 5.5        | 50.0 ± 2.1       |
|            | III        | 68.6 ± 3.8        | 75.4 ± 7.8       |
| 3-117-1    | I          | 63.3 ± 5.0        | 55.4 ± 3.3       |
|            | II         | 73.4 ± 6.9        | 46.8 ± 4.4       |
|            | III        | 86.7 ± 5.8        | 55.5 ± 3.5       |
| 9-121-2    | I          | 56.1 ± 2.6        | 48.7 ± 5.6       |
|            | II         | 66.6 ± 3.6        | 37.8 ± 0.9       |

|              |     |               |               |
|--------------|-----|---------------|---------------|
|              | III | 68.2 ± 3.4    | 56.8 ± 6.6    |
| 9-121-4      | I   | 54.4 ± 2.6 b  | 47.7 ± 1.8 b  |
|              | II  | 87.4 ± 3.9 a  | 71.3 ± 5.2 a  |
|              | III | 73.1 ± 7.2 a  | 68.6 ± 4.6 a  |
| 9-121-5      | I   | 38.8 ± 3.8 b  | 27.9 ± 1.6 c  |
|              | II  | 66.6 ± 6.0 a  | 37.6 ± 1.7 b  |
|              | III | 71.1 ± 4.9 a  | 45.6 ± 3.0 a  |
| 11-110-2     | I   | 35.2 ± 2.7 c  | 29.9 ± 2.1 b  |
|              | II  | 64.4 ± 1.0 b  | 64.7 ± 5.7 a  |
|              | III | 75.7 ± 3.8 a  | 67.1 ± 3.4 a  |
| Abrikosovaya | I   | 57.3 ± 4.3    | 43.5 ± 2.2 b  |
|              | II  | 66.9 ± 6.7    | 62.4 ± 3.7 a  |
|              | III | 64.7 ± 6.7    | 69.9 ± 5.7 a  |
| Arbat        | I   | 69.9 ± 3.0    | 42.9 ± 4.3    |
|              | II  | 63.8 ± 8.0    | 36.6 ± 1.7    |
|              | III | 51.7 ± 5.6    | 33.7 ± 1.8    |
| Gusar        | I   | 39.8 ± 1.4 b  | 30.6 ± 2.6 b  |
|              | II  | 55.6 ± 1.2 a  | 41.4 ± 1.4 a  |
|              | III | 44.7 ± 3.0 b  | 32.4 ± 1.7 b  |
| Karamelka    | I   | 75.7 ± 3.9 a  | 48.3 ± 3.6    |
|              | II  | 66.8 ± 5.3 a  | 40.9 ± 4.4    |
|              | III | 52.4 ± 2.7 b  | 44.5 ± 0.9    |
| Himbo Top    | I   | 75.8 ± 8.2    | 68.9 ± 4.1    |
|              | II  | 82.0 ± 6.4    | 74.2 ± 8.9    |
|              | III | 73.6 ± 6.2    | 65.5 ± 5.5    |
| Octavia      | I   | 20.7 ± 2.4 b  | 14.4 ± 1.6 b  |
|              | II  | 27.2 ± 1.9 ab | 23.2 ± 0.9 a  |
|              | III | 31.5 ± 2.8 a  | 17.9 ± 0.3 b  |
| Polana       | I   | 63.6 ± 2.5 a  | 45.8 ± 6.2 a  |
|              | II  | 32.1 ± 2.4 b  | 24.1 ± 1.6 b  |
|              | III | 58.9 ± 4.4 a  | 34.9 ± 3.5 ab |
| Polesie      | I   | 26.6 ± 2.7 c  | 14.9 ± 1.0 c  |
|              | II  | 63.4 ± 3.5 a  | 40.4 ± 2.6 a  |
|              | III | 36.2 ± 1.4 b  | 28.5 ± 1.2 b  |
| Polka        | I   | 62.8 ± 2.4    | 52.5 ± 5.3    |
|              | II  | 74.0 ± 6.7    | 47.9 ± 4.5    |
|              | III | 61.4 ± 5.3    | 52.5 ± 1.5    |
| Porana Rosa  | I   | 82.9 ± 3.8    | 58.1 ± 3.0    |
|              | II  | 92.0 ± 9.4    | 57.2 ± 4.3    |
|              | III | 80.3 ± 5.3    | 46.5 ± 1.9    |
| Silvan       | I   | 133.8 ± 4.0   | 69.5 ± 4.7    |
|              | II  | 132.5 ± 9.3   | 71.6 ± 3.0    |
|              | III | 129.5 ± 8.7   | 79.6 ± 8.1    |

Results are expressed as mean ± SE ( $n = 3$ ). Different letters represent statistically significant differences ( $p < 0.05$ ).

**Table S7.** Effect of different harvest periods (phenophase) on antioxidant activity (micromol TE/g DW) in raspberry leaves.

| Genotype   | Phenophase | FRAP           | ABTS            |
|------------|------------|----------------|-----------------|
| 1-14-1     | I          | 428.9 ± 24.6   | 415.5 ± 22.3 b  |
|            | II         | 362.5 ± 31.4   | 335.1 ± 19.3 b  |
|            | III        | 449.3 ± 53.4   | 529.1 ± 33.3 a  |
| 1-14-2     | I          | 474.8 ± 26.1 b | 440.8 ± 35.5 b  |
|            | II         | 465.7 ± 27.8 b | 398.1 ± 26.3 b  |
|            | III        | 567.3 ± 17.5 a | 703.3 ± 64.7 a  |
| 1-14-2(zh) | I          | 398.4 ± 44.3   | 393.4 ± 19.5 b  |
|            | II         | 416.3 ± 26.4   | 354.6 ± 28.9 b  |
|            | III        | 508.2 ± 40.1   | 608.8 ± 57.4 a  |
| 1-45-1     | I          | 242.5 ± 28.4 b | 77.2 ± 10.1 c   |
|            | II         | 452.4 ± 49.7 a | 383.9 ± 23.1 b  |
|            | III        | 414.0 ± 9.3 a  | 520.5 ± 31.5 a  |
| 1-45-2     | I          | 306.1 ± 21.7 b | 306.7 ± 30.2 b  |
|            | II         | 482.7 ± 26.0 a | 472.0 ± 49.2 ab |

|              |     |                |                |
|--------------|-----|----------------|----------------|
|              | III | 470.8 ± 41.3 a | 603.0 ± 73.2 a |
| 1-70-1       | I   | 289.2 ± 17.3 b | 260.9 ± 19.0 b |
|              | II  | 322.2 ± 21.5 b | 294.7 ± 23.7 b |
|              | III | 397.0 ± 14.8 a | 473.7 ± 35.7 a |
| 2-66-1       | I   | 468.4 ± 38.3   | 433.6 ± 30.6   |
|              | II  | 376.1 ± 30.8   | 423.4 ± 14.2   |
|              | III | 432.6 ± 23.9   | 505.5 ± 35.6   |
| 2-66-2       | I   | 349.0 ± 11.9   | 340.7 ± 31.6 b |
|              | II  | 483.4 ± 45.2   | 423.0 ± 16.7 b |
|              | III | 495.3 ± 41.9   | 582.5 ± 68.1 a |
| 2-66-3       | I   | 511.0 ± 26.9   | 515.0 ± 39.1 b |
|              | II  | 476.7 ± 24.0   | 372.4 ± 49.1 c |
|              | III | 437.6 ± 31.1   | 841.1 ± 29.9 a |
| 3-117-1      | I   | 458.9 ± 28.4   | 454.2 ± 27.5 b |
|              | II  | 403.9 ± 17.9   | 509.7 ± 16.2 b |
|              | III | 469.5 ± 35.7   | 611.7 ± 27.1 a |
| 9-121-2      | I   | 450.0 ± 46.5   | 443.2 ± 42.8 b |
|              | II  | 325.1 ± 23.3   | 308.5 ± 16.0 c |
|              | III | 501.4 ± 55.5   | 601.7 ± 27.7 a |
| 9-121-4      | I   | 430.7 ± 21.7 b | 429.3 ± 26.1 b |
|              | II  | 646.3 ± 51.3 a | 836.7 ± 42.0 a |
|              | III | 510.0 ± 20.6 b | 786.6 ± 61.0 a |
| 9-121-5      | I   | 214.3 ± 9.4 c  | 207.0 ± 11.6 b |
|              | II  | 298.7 ± 20.0 b | 386.5 ± 37.3 a |
|              | III | 368.4 ± 18.9 a | 441.6 ± 44.8 a |
| 11-110-2     | I   | 239.9 ± 24.5 b | 242.0 ± 15.0 b |
|              | II  | 631.8 ± 32.9 a | 708.8 ± 17.9 a |
|              | III | 652.9 ± 21.2 a | 730.2 ± 34.4 a |
| Abrikosovaya | I   | 357.7 ± 30.0 b | 394.7 ± 17.1 c |
|              | II  | 626.7 ± 53.0 a | 592.5 ± 12.6 b |
|              | III | 623.3 ± 58.5 a | 741.9 ± 71.4 a |
| Arbat        | I   | 305.9 ± 33.4   | 276.3 ± 18.9   |
|              | II  | 287.9 ± 32.9   | 388.8 ± 20.9   |
|              | III | 270.1 ± 16.4   | 337.3 ± 36.9   |
| Gusar        | I   | 230.7 ± 21.8   | 260.6 ± 12.2   |
|              | II  | 314.0 ± 13.1   | 333.0 ± 18.0   |
|              | III | 274.2 ± 28.8   | 346.6 ± 31.2   |
| Karamelka    | I   | 388.2 ± 20.2   | 330.7 ± 38.5   |
|              | II  | 336.9 ± 12.3   | 498.6 ± 42.8   |
|              | III | 373.5 ± 16.6   | 426.0 ± 33.2   |
| Himbo Top    | I   | 570.5 ± 32.2   | 600.2 ± 64.0   |
|              | II  | 590.4 ± 28.8   | 598.9 ± 12.0   |
|              | III | 651.7 ± 25.4   | 729.8 ± 36.8   |
| Octavia      | I   | 95.0 ± 11.6 b  | 95.4 ± 6.6 b   |
|              | II  | 174.1 ± 21.0 a | 180.0 ± 7.6 a  |
|              | III | 116.3 ± 8.5 b  | 202.3 ± 11.6 a |
| Polana       | I   | 360.6 ± 19.0 a | 307.6 ± 31.4 a |
|              | II  | 197.2 ± 15.5 b | 152.1 ± 8.0 b  |
|              | III | 230.5 ± 14.2 b | 339.4 ± 8.7 a  |
| Polesie      | I   | 88.4 ± 10.9 c  | 70.1 ± 5.4 c   |
|              | II  | 324.5 ± 21.4 a | 392.6 ± 20.4 a |
|              | III | 239.6 ± 20.1 b | 281.0 ± 25.1 b |
| Polka        | I   | 469.6 ± 35.1   | 441.8 ± 30.8   |
|              | II  | 413.1 ± 39.8   | 554.5 ± 34.3   |
|              | III | 482.6 ± 56.9   | 576.8 ± 41.5   |
| Porana Rosa  | I   | 431.9 ± 25.1   | 440.4 ± 40.8 b |
|              | II  | 494.0 ± 31.2   | 738.4 ± 60.4 a |
|              | III | 378.8 ± 23.9   | 437.3 ± 48.3 b |
| Silvan       | I   | 507.4 ± 46.7   | 569.2 ± 63.5 b |
|              | II  | 523.3 ± 16.7   | 590.7 ± 21.1 b |
|              | III | 596.5 ± 46.5   | 752.5 ± 21.8 a |

Results are expressed as mean ± SE ( $n = 3$ ). Different letters represent statistically significant differences ( $p < 0.05$ ).
